# Supplementary material for: Characterization of nitrous acid and its potential effects on secondary pollution in warm-season of Beijing urban areas
Source: Copernicus journal article supplement (doi:10.5194/egusphere-2024-367), 2024-03-25
Supplement: Supplementary file 1 [file egusphere-2024-367-supplement.pdf]

## Supporting Information

**Table S1. The average and monthly average value of T, RH, WS.**

| Meteorological Parameters | T (°C)    | RH (%) | WS (m/sec) |      |
|---------------------------|-----------|--------|------------|------|
| average                   | 23.36     | 55.84  | 1.18       |      |
| monthly average           | June      | 28.38  | 34.48      | 1.67 |
|                           | July      | 26.69  | 70.85      | 1.17 |
|                           | August    | 25.98  | 58.82      | 1.16 |
|                           | September | 22.33  | 65.40      | 0.97 |
|                           | October   | 13.42  | 49.64      | 0.94 |

**Table S2. Overview on HONO field observations performed in Beijing since 2000.**

| Date                                                                                                                                                                                                    | Site Property                                          | HONO (ppbV)                    | HONO/NO <sub>2</sub>             | Emission Factor | Reference               |
|---------------------------------------------------------------------------------------------------------------------------------------------------------------------------------------------------------|--------------------------------------------------------|--------------------------------|----------------------------------|-----------------|-------------------------|
| May 16 <sup>th</sup> -25 <sup>th</sup> , 2000<br>Jun. 24 <sup>th</sup> - Jul. 4 <sup>th</sup> , 2000<br>Sep. 7 <sup>th</sup> -11 <sup>th</sup> , 2000<br>Dec. 18 <sup>th</sup> -28 <sup>th</sup> , 2000 | Urban site<br>(Peking University)<br>39.54°N, 116.23°E | 3.51<br>3.05<br>2.66<br>2.97   | -                                | ---             | (Hu et al., 2002)       |
| Jul.-Aug., 2002<br>Jul.-Aug., 2003                                                                                                                                                                      | Urban site<br>(Peking University)<br>39.54°N, 116.23°E | 3.6                            | -                                | -               | (Wu et al., 2009)       |
| Jan. 23 <sup>rd</sup> -Feb. 14 <sup>th</sup> , 2007<br>Aug. 2 <sup>nd</sup> -Aug. 31 <sup>st</sup> , 2007                                                                                               | Urban site<br>(Peking University)<br>39.99°N, 116.28°E | 1.04<br>1.45                   | 0.03<br>0.05                     | 0.0065          | (Spataro et al., 2013)  |
| Jul. 2008-Apr. 2009                                                                                                                                                                                     | Urban site<br>(Institute of Atmospheric                | 0.19 (Spring)<br>0.18 (Summer) | 0.015 (Spring)<br>0.008 (Summer) | -               | (Hendrick et al., 2014) |

|                                                                                                                                                                                                           |                                                                                                                       |                                                                  |                                                          |               |                          |
|-----------------------------------------------------------------------------------------------------------------------------------------------------------------------------------------------------------|-----------------------------------------------------------------------------------------------------------------------|------------------------------------------------------------------|----------------------------------------------------------|---------------|--------------------------|
|                                                                                                                                                                                                           | Physics of the Chinese Academy of Sciences, IAPCAS)<br>39.98°N,116.38°E                                               | 0.46 (Fall)<br>0.48 (Winter)                                     | 0.020 (Fall)<br>0.015 (Winter)                           |               |                          |
| Oct.28 <sup>th</sup> -Nov.3 <sup>rd</sup> , 2014                                                                                                                                                          | Urban site<br>(Institute of Chemistry, Chinese Academy of Sciences, ICCAS)<br>39.99°N,116.32°E                        | 1.45                                                             | 0.039                                                    | 0.0065        | (Tong et al.,<br>2015)   |
|                                                                                                                                                                                                           | Suburban Site<br>(Lake yanqi campus of University of Chinese Academy of<br>Sciences, UCAS) 40.4°N, 116.6°E            | 0.74                                                             | 0.088                                                    |               |                          |
| Feb.22 <sup>nd</sup> -Mar.2 <sup>nd</sup> , 2014                                                                                                                                                          | Urban site<br>(ICCAS) 39.99°N,116.32°E                                                                                | 0.28-3.24                                                        | -                                                        | 0.0065        | (Hou et al.,<br>2016)    |
| Dec.12 <sup>th</sup> -Dec.22 <sup>nd</sup> , 2015                                                                                                                                                         | Urban site<br>(ICCAS) 39.99°N,116.32°E                                                                                | 0.86                                                             | 0.052                                                    |               | (Tong et al.,<br>2016)   |
|                                                                                                                                                                                                           | Suburban Site<br>(Lake yanqi campus of UCAS) 40.4°N, 116.6°E                                                          | 0.52                                                             | 0.08                                                     |               |                          |
| Sep.22 <sup>nd</sup> -Oct.21 <sup>th</sup> ,2015<br>Jan.3 <sup>rd</sup> -Jan.27 <sup>th</sup> ,2016<br>Apr.1 <sup>st</sup> -May14 <sup>th</sup> ,2016<br>Jun.20 <sup>th</sup> -Jul.25 <sup>th</sup> ,2016 | Urban site<br>(Research Center for Eco-Environmental Sciences, Chinese<br>Academy of Sciences)<br>40.0078°N, 116.33°E | 2.27 (Fall)<br>1.05 (Winter)<br>1.05 (Spring)<br>1.38 (Summer)   | 0.070±0.033<br>0.046±0.024<br>0.041±0.023<br>0.079±0.014 | -             | (Wang et al.,<br>2017)   |
| Dec. 16 <sup>th</sup> -23 <sup>rd</sup> , 2016                                                                                                                                                            | Urban site<br>(ICCAS) 39.99°N,116.32°E                                                                                | 3.5±2.7                                                          | -                                                        | 0.013         | (Zhang et al.,<br>2019)  |
| Apr. 14 <sup>th</sup> -28 <sup>th</sup> , 2017                                                                                                                                                            | Urban site<br>(ICCAS) 39.99°N,116.32°E                                                                                | 1.21                                                             | -                                                        | 0.008         | (Lin et al., 2022)       |
| Dec. 15 <sup>th</sup> ,2017-Jan. 4 <sup>th</sup> ,<br>2018                                                                                                                                                | Urban site<br>(ICCAS) 39.99°N,116.32°E                                                                                | 1.17±1.20                                                        | -                                                        | 0.0051-0.0081 | (Zhang et al.,<br>2022a) |
| May 7 <sup>th</sup> -30 <sup>th</sup> , 2017<br>Jan. 15 <sup>th</sup> -30 <sup>th</sup> , 2018                                                                                                            | Urban site<br>(Chinese Research Academy of Environmental Sciences)<br>(CRAES) 40°04'N, 116°42'E                       | 1.25±0.94<br>(Summer)<br>1.04±1.27<br>(Winter)                   | 0.072±0.052<br>(Summer)<br>0.041±0.026<br>(Winter)       | 0.008         | (Gu et al., 2022)        |
| Apr.-May, 2016<br>Jul.-Aug., 2017<br>Oct.-Nov., 2017<br>Dec. 2017- Feb., 2018                                                                                                                             | Urban site<br>the Institute of Urban Meteorological<br>39°56'N,116°17'E                                               | 3.17 (Spring)<br>3.53 (Summer)<br>4.30 (Autumn)<br>1.70 (Winter) | -                                                        | -             | (Su et al., 2021)        |
| Aug. 18 <sup>th</sup> -Sep. 16 <sup>th</sup> ,<br>2018                                                                                                                                                    | Suburban Site<br>Qingyuan campus of Beijing Institute<br>of Petrochemical Technology (BIPT)                           | 0.38 ± 0.35                                                      | -                                                        | 0.0085        | (Xuan et al.,<br>2023)   |

|                                                                                                                                                                                                                                             |                                                                                               |                                                          |                                                             |                    |                       |
|---------------------------------------------------------------------------------------------------------------------------------------------------------------------------------------------------------------------------------------------|-----------------------------------------------------------------------------------------------|----------------------------------------------------------|-------------------------------------------------------------|--------------------|-----------------------|
| Oct. 25 <sup>th</sup> -Dec. 7 <sup>th</sup> , 2018                                                                                                                                                                                          | Urban site<br>(ICCAS) 39.99°N,116.32°E<br>IAPCAS<br>39.98°N,116.38°E                          | 2.52±1.61                                                |                                                             | 0.00973            | (Zhang et al., 2023b) |
| May 25 <sup>th</sup> -Jul.15 <sup>th</sup> , 2018<br>Nov. 26 <sup>th</sup> , 2018-Jan. 15 <sup>th</sup> , 2019                                                                                                                              | IAPCAS<br>39.98°N,116.38°E                                                                    | 1.27±0.44<br>(Summer)<br>1.13±0.68<br>(Winter)           | 6.75±1.43%<br>(Summer)<br>5.09±2.69%<br>(Winter)            | 0.0078             | (Liu et al., 2021)    |
| Dec. 22 <sup>nd</sup> , 2018-Jan. 23 <sup>rd</sup> , 2019                                                                                                                                                                                   | Urban site<br>(ICCAS) 39.99°N,116.32°E                                                        | 0.98±0.85                                                | -                                                           | 0.0051-0.0081      | (Zhang et al., 2022b) |
| Jun. 13 <sup>th</sup> -Jul.4 <sup>th</sup> , 2019                                                                                                                                                                                           | Urban site<br>(CRAES) 40°04'N, 116°42'E                                                       | 0.44±0.24                                                | -                                                           | 0.003,0.0065,0.008 | (Li et al., 2021)     |
| Jan. 22 <sup>th</sup> -Feb. 28 <sup>th</sup> , 2018;<br>Dec. 1 <sup>st</sup> , 2018-Feb. 28 <sup>th</sup> , 2019;<br>Dec. 1 <sup>st</sup> , 2019-Feb. 28 <sup>th</sup> , 2020;<br>Dec. 1 <sup>st</sup> , 2020-Feb. 28 <sup>th</sup> , 2021; | Urban site,<br>(West Campus of Beijing University of Chemical Technology)<br>39.95°N,116.31°E | 0.66 (2018)<br>1.38 (2019)<br>0.95 (2020)<br>1.30 (2021) | 0.038(2018)<br>0.052 (2019)<br>0.042 (2020)<br>0.067 (2021) | 0.0079             | (Lian et al., 2022)   |
| Oct. 1 <sup>st</sup> -Oct. 31 <sup>st</sup> ,2019                                                                                                                                                                                           | Urban site<br>(ICCAS) 39.99°N,116.32°E                                                        | 0.99                                                     | -                                                           | -                  | (Jia et al., 2023)    |
| Mar. 1 <sup>st</sup> -30 <sup>th</sup> , 2021                                                                                                                                                                                               | Urban site<br>(ICCAS) 39.99°N,116.32°E                                                        | 1.48±1.09                                                | 0.07                                                        | 0.008              | (Zhang et al., 2023a) |
| Jun.18 <sup>th</sup> -Oct.25 <sup>th</sup> , 2021                                                                                                                                                                                           | Urban site<br>(CRAES) 40°04'N, 116°42'E                                                       | 1.06                                                     | 0.052                                                       | 0.0172             | This work             |

**Table S3. Correlations of Punknown against various parameters during the observation period.**

| Parameters | June | July | August | summer | September | October | autumn | sum |
|------------|------|------|--------|--------|-----------|---------|--------|-----|
|------------|------|------|--------|--------|-----------|---------|--------|-----|

|                                                                     | R, N = 42 | R, N = 82 | R, N = 103 | R, N= 227 | R, N = 102 | R, N = 64 | R, N= 166 | R, N= 393         |
|---------------------------------------------------------------------|-----------|-----------|------------|-----------|------------|-----------|-----------|-------------------|
| NO <sub>2</sub>                                                     | 0.42      | 0.42      | -0.3       | 0.19      | -0.05      | 0.08      | -0.21     | -0.09             |
| JNO <sub>2</sub>                                                    | -0.18     | 0.038     | -0.076     | -0.044    | 0.21       | -0.13     | 0.23      | 0.12              |
| PM <sub>2.5</sub>                                                   | 0.66      | 0.49      | 0.06       | 0.30      | -0.20      | 0.16      | -0.088    | 0.05              |
| RH                                                                  | 0.63      | 0.04      | -0.38      | 0.05      | -0.23      | 0.11      | -0.067    | -0.003            |
| NO <sub>3</sub> <sup>-</sup>                                        | 0.39      | 0.48      | -0.17      | 0.21      | -0.16      | 0.16      | -0.083    | 0.007             |
| JNO <sub>2</sub> *RH                                                | 0.71      | 0.15      | -0.36      | 0.039     | -0.024     | -0.025    | 0.20      | 0.13              |
| NO <sub>2</sub> *PM <sub>2.5</sub>                                  | 0.57      | 0.50      | -0.1       | 0.28      | -0.19      | 0.034     | -0.17     | -0.077            |
| NO <sub>2</sub> *OC                                                 | 0.57      | 0.45      | -0.058     | 0.26      | -0.15      | 0.062     | -0.17     | -10 <sup>-4</sup> |
| NO <sub>2</sub> *EC                                                 | 0.22      | 0.32      | -0.12      | 0.15      | -0.14      | 0.11      | -0.16     | -0.078            |
| NO <sub>2</sub> *JNO <sub>2</sub> *PM <sub>2.5</sub>                | 0.62      | 0.32      | -0.12      | 0.24      | -0.11      | -0.06     | -0.11     | -0.02             |
| NO <sub>2</sub> *JNO <sub>2</sub> *RH*PM <sub>2.5</sub>             | 0.60      | 0.33      | -0.18      | 0.22      | -0.12      | -0.049    | -0.092    | 0.019             |
| NO <sub>2</sub> *JNO <sub>2</sub> *OC                               | 0.58      | 0.21      | -0.12      | 0.19      | -0.031     | -0.1      | -0.013    | 0.09              |
| NO <sub>2</sub> *JNO <sub>2</sub> *RH*OC                            | 0.62      | 0.26      | -0.18      | 0.20      | -0.07      | -0.04     | 0.008     | 0.12              |
| NO <sub>2</sub> *JNO <sub>2</sub> *EC                               | 0.36      | 0.22      | -0.15      | 0.095     | -0.11      | -0.1      | -0.12     | -0.05             |
| NO <sub>2</sub> *JNO <sub>2</sub> *RH*EC                            | 0.41      | 0.22      | -0.19      | 0.088     | -0.13      | -0.07     | -0.10     | -0.021            |
| JNO <sub>2</sub> *NO <sub>3</sub> <sup>-</sup>                      | 0.48      | 0.29      | -0.20      | 0.18      | -0.09      | 0.032     | 0.005     | 0.065             |
| JNO <sub>2</sub> *RH*NO <sub>3</sub> <sup>-</sup>                   | 0.50      | 0.30      | -0.24      | 0.16      | -0.10      | 0.006     | 0.047     | 0.11              |
| JNO <sub>2</sub> *NO <sub>3</sub> *SO <sub>4</sub> <sup>2-</sup>    | 0.26      | 0.32      | -0.14      | 0.10      | -0.16      | 0.13      | -0.023    | 0.021             |
| JNO <sub>2</sub> *RH*NO <sub>3</sub> *SO <sub>4</sub> <sup>2-</sup> | 0.23      | 0.33      | -0.17      | 0.092     | -0.15      | 0.16      | 0.0069    | 0.049             |
| JNO <sub>2</sub> *NO <sub>3</sub> *Cl <sup>-</sup>                  | 0.16      | 0.46      | -0.26      | 0.17      | -0.12      | 0.093     | -0.074    | -0.0085           |
| JNO <sub>2</sub> *RH*NO <sub>3</sub> *Cl <sup>-</sup>               | 0.14      | 0.44      | -0.27      | -0.029    | -0.11      | 0.075     | -0.058    | 0.052             |
| JNO <sub>2</sub> *NO <sub>3</sub> *OC                               | 0.55      | 0.26      | -0.05      | 0.19      | -0.14      | 0.045     | -0.05     | 0.038             |
| JNO <sub>2</sub> *RH*NO <sub>3</sub> *OC                            | 0.52      | 0.29      | -0.23      | 0.18      | -0.11      | 0.027     | -0.020    | -0.079            |

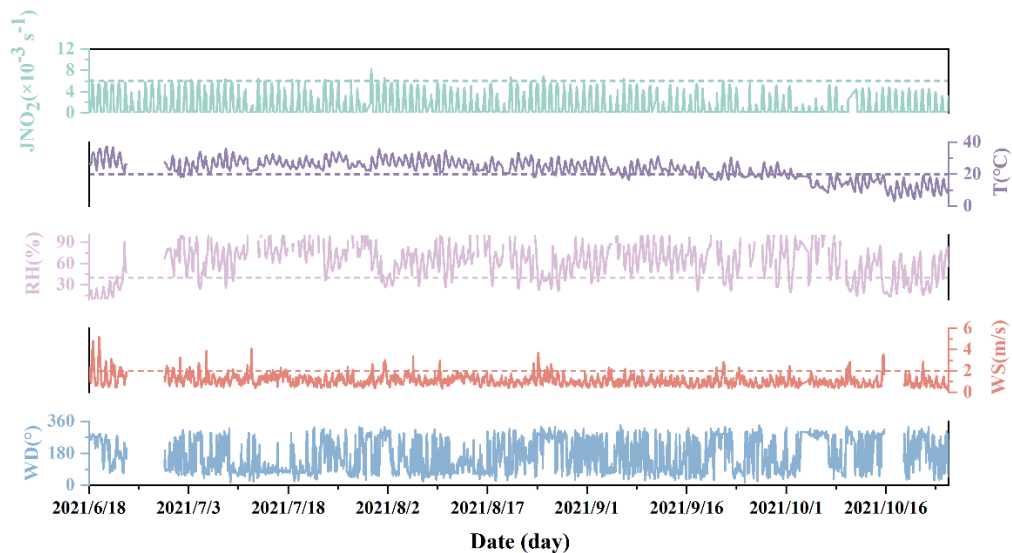

Figure S1. Temporal trends of hourly average RH, T, WD, WS, and JNO2 during the measurement.

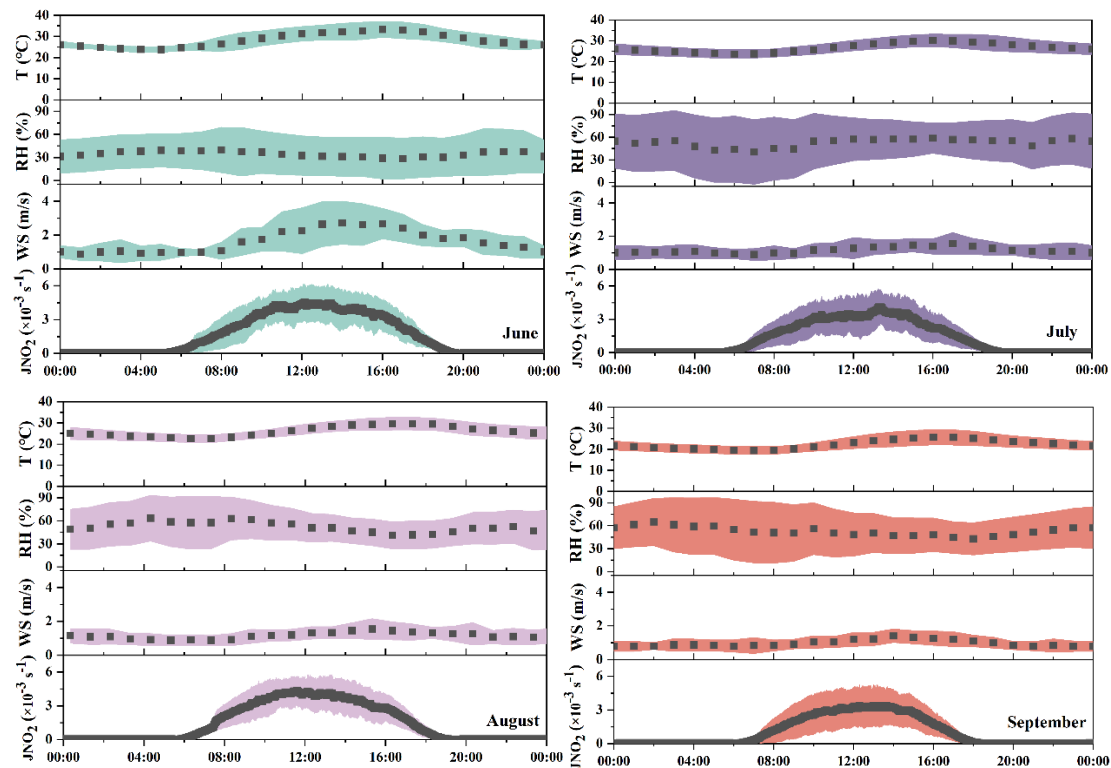

5

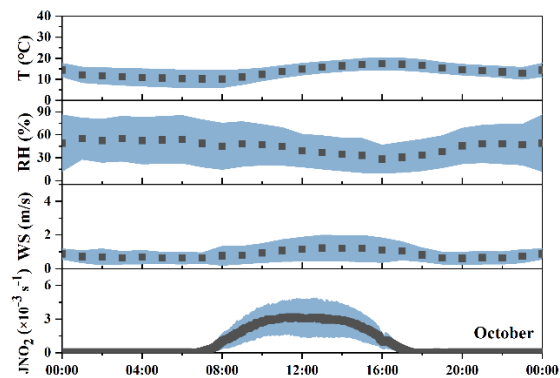

Figure S2. Daily averaged variation of several meteorology data during the observation.

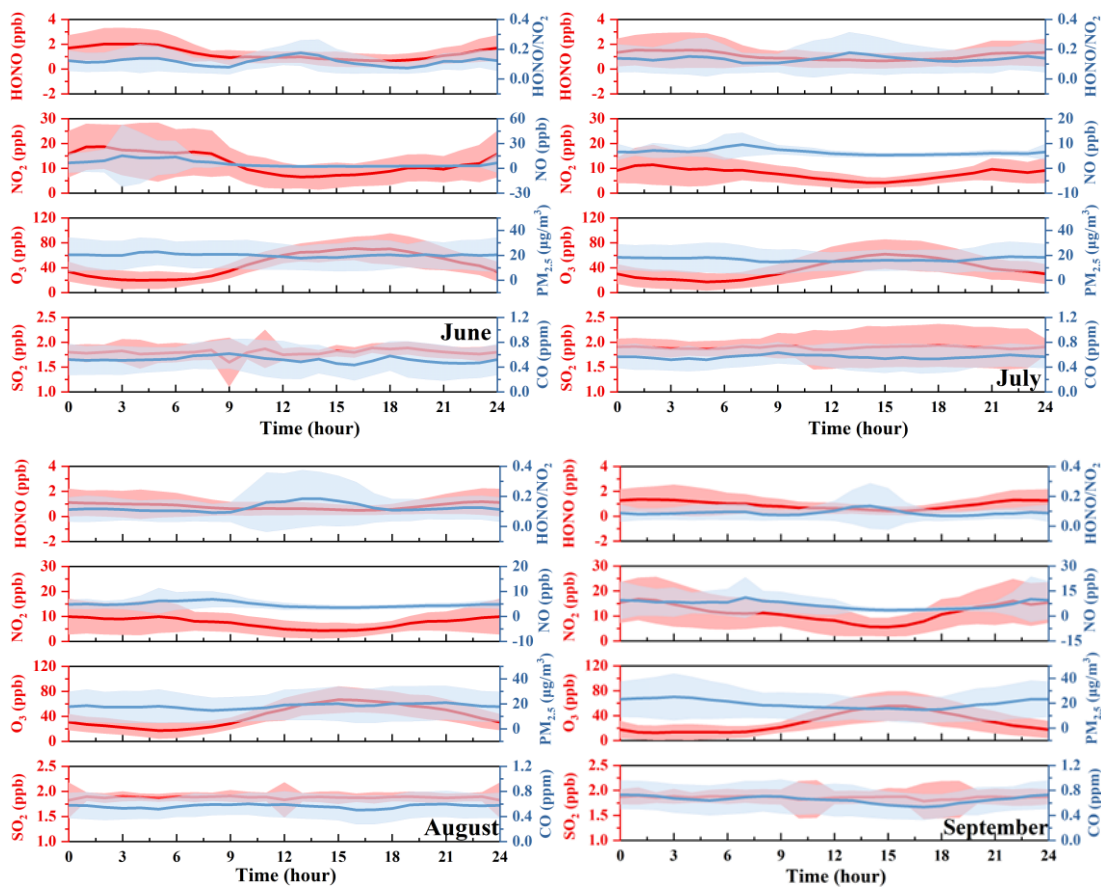

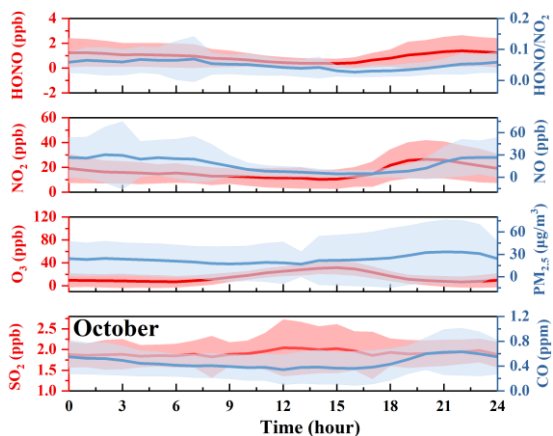

10 **Figure S3.** Daily averaged values of several parameters during the observation. The shaded areas represent the standard deviation of the corresponding pollutant concentration.

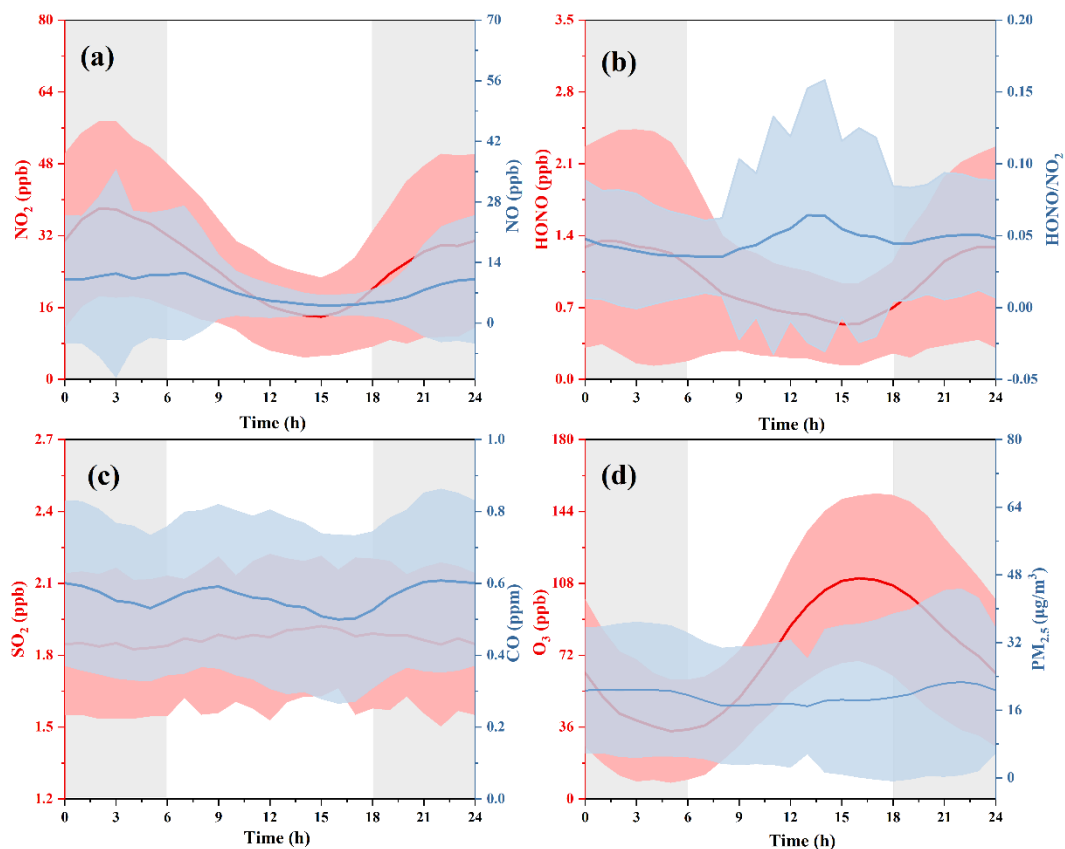

15 **Figure S4.** Daily averaged values of several parameters during the observation. The shaded areas represent the standard deviation of the corresponding pollutant concentration. The gray shading areas indicate nighttime, 18:00-06:00 LT.

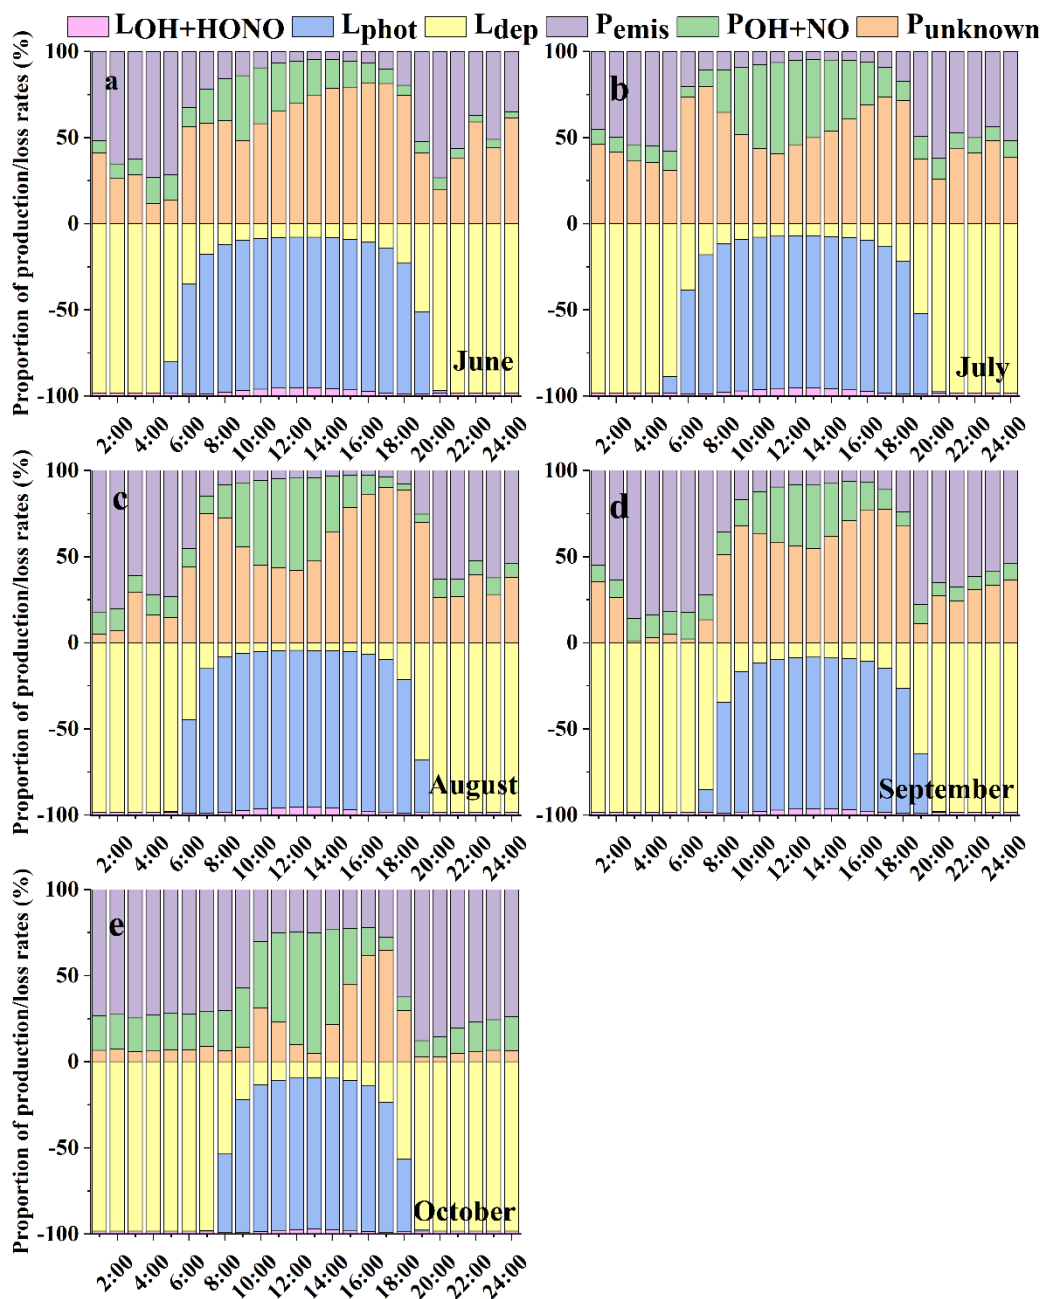

Figure S5. Daytime HONO budget proportion in average production (Pemis, PNO+OH, Punknown) and loss rates (LOH+HONO, Lphot, Ldep) during the five months: (a) June, (b) July, (c) August, (d) September, (e) October.



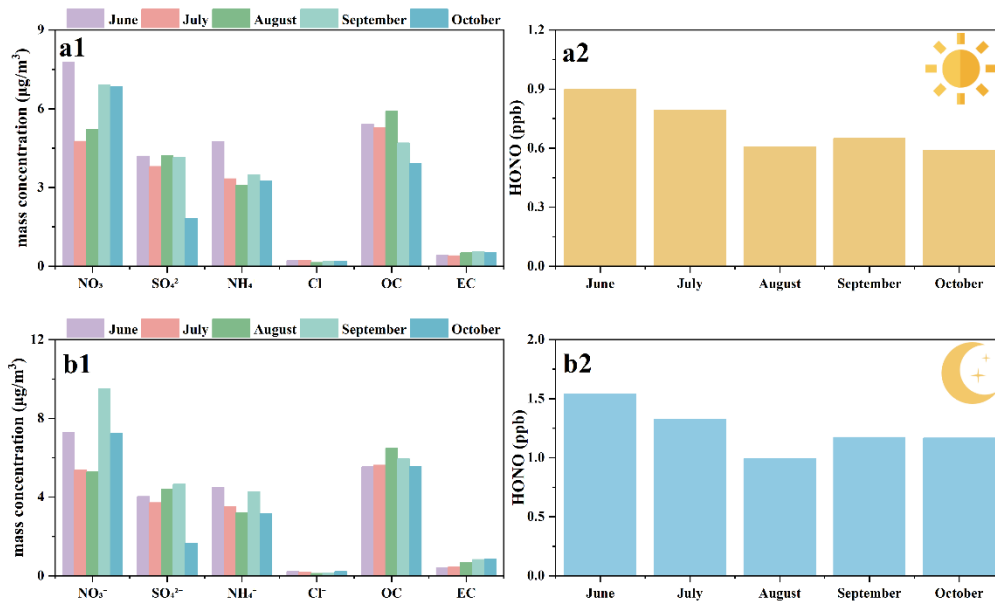

20 **Figure S6. Distributions of  $\text{NO}_3^-$ ,  $\text{SO}_4^{2-}$ ,  $\text{NH}_4^+$ ,  $\text{Cl}^-$ , OC, EC, and HONO mean concentrations under different months. The upper panel was the daytime average value (7:00-18:00), and the bottom panel was the nighttime average value (19:00-6:00)**

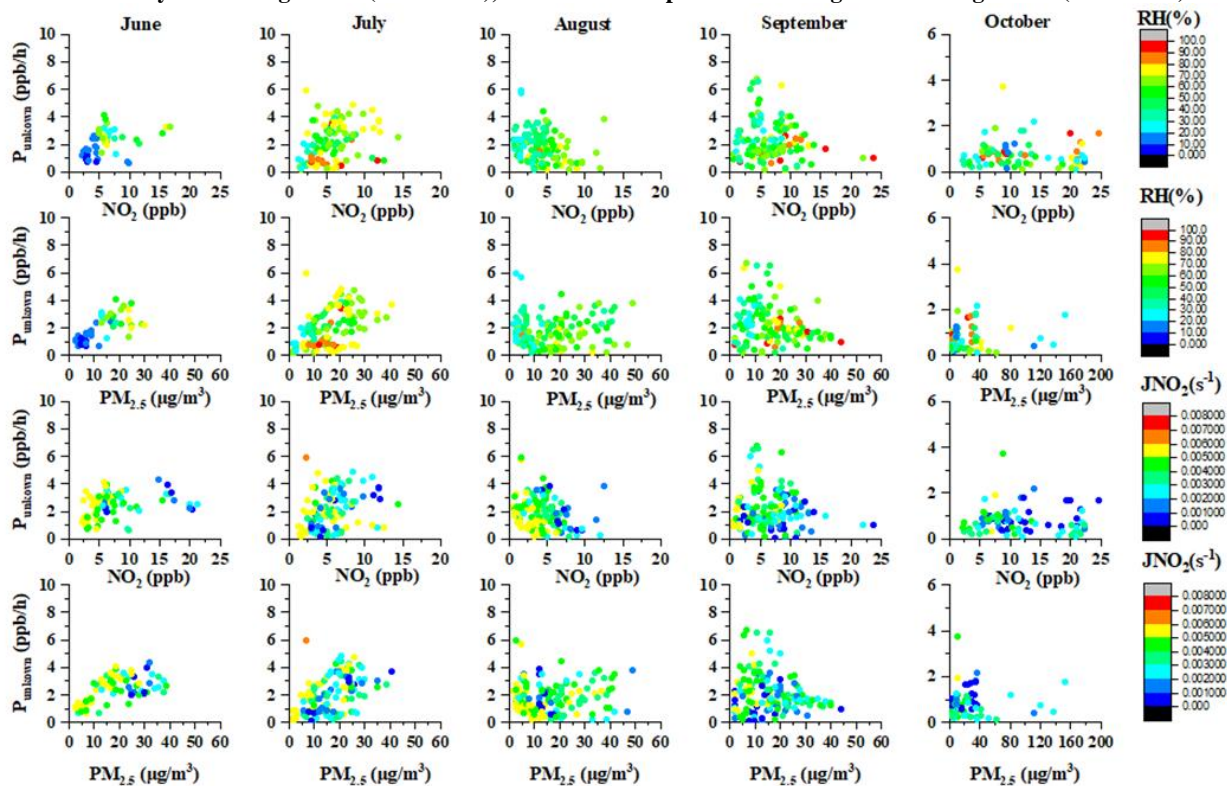

**Figure S7. Scatter plots of Punkown versus  $\text{NO}_2$  and  $\text{PM}_{2.5}$  concentrations by month with colormaps to distinguish the changes in relative humidity (RH) and  $\text{JNO}_2$**

## 25 References

- Gu, R., Shen, H., Xue, L., Wang, T., Gao, J., Li, H., Liang, Y., Xia, M., Yu, C., Liu, Y., and Wang, W.: Investigating the sources of atmospheric nitrous acid (HONO) in the megacity of Beijing, China, *Sci. Total Environ.*, 812, 152270, doi: 10.1016/j.scitotenv.2021.152270, 2022.
- 30 Hendrick, F., Müller, J. F., Clémer, K., Wang, P., De Mazière, M., Fayt, C., Gielen, C., Hermans, C., Ma, J. Z., Pinardi, G., Stavrou, T., Vlemmix, T., and Van Roozendaal, M.: Four years of ground-based MAX-DOAS observations of HONO and NO<sub>2</sub> in the Beijing area, *Atmos. Chem. Phys.*, 14, 765–781, doi: 10.5194/acp-14-765-2014, 2014.
- Hou, S., Tong, S., Ge, M., and An, J.: Comparison of atmospheric nitrous acid during severe haze and clean periods in Beijing, China, *Atmos. Environ.*, 124, 199–206, doi: 10.1016/j.atmosenv.2015.06.023, 2016.
- 35 Hu, M., Zhou, F., Shao, K., Zhang, Y., Tang, X., and Slanina, J.: Diurnal variations of aerosol chemical compositions and related gaseous pollutants in Beijing and Guangzhou, *J. Environ. Sci. Health A, Part A*, 37, 479–488, doi: 10.1081/ese-120003229, 2002.
- Jia, C., Tong, S., Zhang, X., Li, F., Zhang, W., Li, W., Wang, Z., Zhang, G., Tang, G., Liu, Z., and Ge, M.: Atmospheric oxidizing capacity in autumn Beijing: Analysis of the O<sub>3</sub> and PM<sub>2.5</sub> episodes based on observation-based model, *J. Environ. Sci. (China)*, 124, 557–569, doi: 10.1016/j.jes.2021.11.020, 2023.
- 40 Li, Y., Wang, X., Wu, Z., Li, L., Wang, C., Li, H., Zhang, X., Zhang, Y., Li, J., Gao, R., Xue, L., Mellouki, A., Ren, Y., and Zhang, Q.: Atmospheric nitrous acid (HONO) in an alternate process of haze pollution and ozone pollution in urban Beijing in summertime: Variations, sources and contribution to atmospheric photochemistry, *Atmos. Res.*, 260, 105689, doi: 10.1016/j.atmosres.2021.105689, 2021.
- 45 Lian, C., Wang, W., Chen, Y., Zhang, Y., Zhang, J., Liu, Y., Fan, X., Li, C., Zhan, J., Lin, Z., Hua, C., Zhang, W., Liu, M., Li, J., Wang, X., An, J., and Ge, M.: Long-term winter observation of nitrous acid in the urban area of Beijing, *J. Environ. Sci. (China)*, 114, 334–342, doi: 10.1016/j.jes.2021.09.010, 2022.
- Lin, D., Tong, S., Zhang, W., Li, W., Li, F., Jia, C., Zhang, G., Chen, M., Zhang, X., Wang, Z., Ge, M., and He, X.: Formation mechanisms of nitrous acid (HONO) during the haze and non-haze periods in Beijing, China, *J. Environ. Sci. (China)*, 114, 343–353, doi: 10.1016/j.jes.2021.09.013, 2022.
- 50 Liu, J., Liu, Z., Ma, Z., Yang, S., Yao, D., Zhao, S., Hu, B., Tang, G., Sun, J., Cheng, M., Xu, Z., and Wang, Y.: Detailed budget analysis of HONO in Beijing, China: Implication on atmosphere oxidation capacity in polluted megacity, *Atmos. Environ.*, 244, 117957, doi: 10.1016/j.atmosenv.2020.117957, 2021.
- Spataro, F., Ianniello, A., Esposito, G., Allegrini, I., Zhu, T., and Hu, M.: Occurrence of atmospheric nitrous acid in the urban area of Beijing (China), *Sci. Total Environ.*, 447, 210–224, doi: 10.1016/j.scitotenv.2012.12.065, 2013.
- 55 Su, J., Zhao, P., Ding, J., Du, X., and Dou, Y.: Insights into measurements of water-soluble ions in PM<sub>2.5</sub> and their gaseous precursors in Beijing, *J. Environ. Sci. (China)*, 102, 123–137, doi: 10.1016/j.jes.2020.08.031, 2021.
- Tong, S., Hou, S., Zhang, Y., Chu, B., Liu, Y., He, H., Zhao, P., and Ge, M.: Comparisons of measured nitrous acid (HONO) concentrations in a pollution period at urban and suburban Beijing, in autumn of 2014, *Sci. China Chem.*, 58, 1393–1402, doi: 10.1007/s11426-015-5454-2, 2015.
- 60 Tong, S., Hou, S., Zhang, Y., Chu, B., Liu, Y., He, H., Zhao, P., and Ge, M.: Exploring the nitrous acid (HONO) formation mechanism in winter Beijing: direct emissions and heterogeneous production in urban and suburban areas, *Faraday Discuss.*, 189, 213–230, doi: 10.1039/c5fd00163c, 2016.
- Wang, J., Zhang, X., Guo, J., Wang, Z., and Zhang, M.: Observation of nitrous acid (HONO) in Beijing, China: Seasonal variation, nocturnal formation and daytime budget, *Sci. Total Environ.*, 587–588, 350–359, doi: 10.1016/j.scitotenv.2017.02.159, 2017.
- 65 Wu, Z., Hu, M., Shao, K., and Slanina, J.: Acidic gases, NH<sub>3</sub> and secondary inorganic ions in PM<sub>10</sub> during summertime in Beijing, China and their relation to air mass history, *Chemosphere*, 76, 1028–1035, doi: 10.1016/j.chemosphere.2009.04.066, 2009.
- Xuan, H., Zhao, Y., Ma, Q., Chen, T., Liu, J., Wang, Y., Liu, C., Wang, Y., Liu, Y., Mu, Y., and He, H.: Formation mechanisms and atmospheric implications of summertime nitrous acid (HONO) during clean, ozone pollution and double high-level PM<sub>2.5</sub> and O<sub>3</sub> pollution periods in Beijing, *Sci. Total Environ.*, 857, 159538, doi: 10.1016/j.scitotenv.2022.159538, 2023.
- 70 Zhang, W., Tong, S., Ge, M., An, J., Shi, Z., Hou, S., Xia, K., Qu, Y., Zhang, H., Chu, B., Sun, Y., and He, H.: Variations and

- 75 sources of nitrous acid (HONO) during a severe pollution episode in Beijing in winter 2016, *Sci. Total Environ.*, 648, 253–262, doi: 10.1016/j.scitotenv.2018.08.133, 2019.
- Zhang, W., Tong, S., Jia, C., Ge, M., Ji, D., Zhang, C., Liu, P., Zhao, X., Mu, Y., Hu, B., Wang, L., Tang, G., Li, X., Li, W., and Wang, Z.: Effect of different combustion processes on atmospheric nitrous acid formation mechanisms: A winter comparative observation in urban, suburban and rural areas of the North China Plain, *Environ. Sci. Technol.*, 56, 4828–4837, doi: 10.1021/acs.est.1c07784, 2022a.
- 80 Zhang, W., Tong, S., Lin, D., Li, F., Zhang, X., Wang, L., Ji, D., Tang, G., Liu, Z., Hu, B., and Ge, M.: Atmospheric chemistry of nitrous acid and its effects on hydroxyl radical and ozone at the urban area of Beijing in early spring 2021, *Environ. Pollut.*, 316, 120710, doi: 10.1016/j.envpol.2022.120710, 2023a.
- Zhang, X., Tong, S., Jia, C., Zhang, W., Li, J., Wang, W., Sun, Y., Wang, X., Wang, L., Ji, D., Wang, L., Zhao, P., Tang, G., Xin, J., Li, A., and Ge, M.: The levels and sources of nitrous acid (HONO) in winter of Beijing and Sanmenxia, *J. Geophys. Res. Atmos.*, 127, e2021JD036278, doi: 10.1029/2021jd036278, 2022b.
- 85 Zhang, X., Tong, S., Jia, C., Zhang, W., Wang, Z., Tang, G., Hu, B., Liu, Z., Wang, L., Zhao, P., Pan, Y., and Ge, M.: Elucidating HONO formation mechanism and its essential contribution to OH during haze events, *NPJ Clim. Atmos. Sci.*, 6, doi: 10.1038/s41612-023-00371-w, 2023b.
